# Supplementary material for: Albumin Levels and Risk of Early Cardiovascular Complications After Ischemic Stroke: A Propensity-Matched Analysis of a Global Federated Health Network
Source: PubMed Central journal article supplement (PMC10896196; doi:10.1161/strokeaha.123.044248), 2024-02-07
Supplement: str-55-604-s001.pdf [file str-55-604-s001.pdf]

**Albumin levels and risk of early cardiovascular complications after ischemic stroke:**

**A propensity-matched analysis of a global federated health network**

Tommaso Bucci, Daniele Pastori, Pasquale Pignatelli, George Ntaios, Azmil H. Abdul-Rahim,  
Francesco Violi & Gregory Y H Lip.

Supplemental Material

The TriNetX data are collected from member healthcare organizations (HCO) and originates from their primary electronic health records (EHR) system. A typical HCO is a large academic health center with data coming from majority of its affiliates. A single HCO frequently has more than one facility, including main and satellite hospitals. The data are stored on the TriNetX database via a physical server at the institution's data centre or a virtual hosted appliance. The TriNetX platform comprises of a series of these appliances connected into a federated network. This network can broadcast queries to each appliance. Results are subsequently collected and aggregated. Once the data are sent to the network, it is mapped to a standard and controlled set of clinical terminologies and undergoes a data quality assessment including 'data cleaning' that rejects records which do not meet the TriNetX quality standards. The TriNetX database performs internal and extensive data quality assessment with every refresh based on conformance, completeness, and plausibility (<http://doi.org/10.13063/2327-9214.1244>). HIPAA (Health Insurance Portability and Accountability Act) compliance of the clinical patient data is achieved using deidentification. Available data types within the network include demographics, diagnoses (represented by ICD-10-CM codes), procedures (coded in ICD-10-PCS or CPT), and measurements (coded to LOINC). While extensive information is provided about patients' diagnoses and procedures, other variables (such as socioeconomic and lifetime factors are not comprehensively represented). The advantage of electronic health record data over insurance claim data is that both insured and uninsured patients are included. An advantage of electronic health record data over survey data is that the former represents the diagnostic rates in the population presenting to healthcare facilities. This provides an accurate account of the burden of specific diagnoses on healthcare systems. One primary limitation of relying on diagnoses is that they do not account for undiagnosed patients who might have a condition but have not yet received medical support. Another general limitation of electronic health record data is that a patient may be seen in different HCO for different components of their care. If one healthcare organization is not part of the federated network, then part of their medical records may not be available. Using a network of healthcare organizations, rather than a single site, limits this possibility but does not fully remove it. Propensity Score Matched Analyses Using logistic regression [Logistic Regression of the scikit-learn package in Python (version 3.7)], TriNetX performs a 1:1 greedy nearest neighbor matching model, with a caliper of 0.1 pooled standard deviations. To eliminate bias resulting from nearest neighbor algorithms, the orders of rows are randomized. Any baseline characteristic with a standardized mean difference between cohorts lower than 0.1 is deemed well matched (<https://www.tandfonline.com/doi/full/10.1080/00273171.2011.568786>).

Table S1. ICD-10-CM codes for early cardiovascular complications.

| Early cardiovascular complications | ICD-10-CM-codes                                                                                                                                |
|------------------------------------|------------------------------------------------------------------------------------------------------------------------------------------------|
| All-cause death                    | <ul style="list-style-type: none"> <li>• Deceased (variable codified by TriNetX).</li> </ul>                                                   |
| Acute myocardial infarction        | <ul style="list-style-type: none"> <li>• I21 Acute myocardial infarction</li> </ul>                                                            |
| Atrial fibrillation                | <ul style="list-style-type: none"> <li>• I48 Atrial fibrillation and flutter</li> </ul>                                                        |
| Ventricular arrhythmias            | <ul style="list-style-type: none"> <li>• I49.0 Ventricular fibrillation and flutter and/or</li> <li>• I47.2 Ventricular tachycardia</li> </ul> |
| Heart failure                      | <ul style="list-style-type: none"> <li>• I50 Heart failure</li> </ul>                                                                          |
| Takotsubo cardiopathy              | <ul style="list-style-type: none"> <li>• I51.81 Takotsubo syndrome</li> </ul>                                                                  |

Table S2. Baseline characteristics, of stroke patients (without other possible causes of hypoalbuminemia) with reduced (cohort 1, n = 49,807) compared to normal (cohort 2, n = 232,965) albumin levels, before and after propensity score matching.

| <b>Demographics</b> |         |                                                       |               |          |             |         |           |
|---------------------|---------|-------------------------------------------------------|---------------|----------|-------------|---------|-----------|
| Cohort              |         |                                                       | Mean ± SD     | Patients | % of Cohort | P-Value | Std diff. |
| 1                   | Age     | Age                                                   | 72.8 +/- 14.2 | 49,807   | 100%        | <0.001  | 0.140     |
| 2                   |         |                                                       | 70.8 +/- 14.7 | 232,965  | 100%        |         |           |
| 1                   | 2106-3  | White                                                 |               | 32,233   | 64.7%       | <0.001  | 0.031     |
| 2                   |         |                                                       | 154,251       | 66.2%    |             |         |           |
| 1                   | F       | Female                                                |               | 24,756   | 49.7%       | <0.001  | 0.032     |
| 2                   |         |                                                       | 112,023       | 48.1%    |             |         |           |
| 1                   | 2054-5  | Black or African American                             |               | 10,727   | 21.5%       | <0.001  | 0.072     |
| 2                   |         |                                                       | 43,501        | 18.7%    |             |         |           |
| 1                   | 2028-9  | Asian                                                 |               | 1,043    | 2.1%        | <0.001  | 0.025     |
| 2                   |         |                                                       | 5,743         | 2.5%     |             |         |           |
| <b>Diagnosis</b>    |         |                                                       |               |          |             |         |           |
| Cohort              |         |                                                       | Mean ± SD     | Patients | % of Cohort | P-Value | Std diff. |
| 1                   | I10-I16 | Hypertension                                          |               | 35,542   | 71.4%       | <0.001  | 0.432     |
| 2                   |         |                                                       | 118,228       | 50.7%    |             |         |           |
| 1                   | I20-I25 | Ischemic heart diseases                               |               | 17,166   | 34.5%       | <0.001  | 0.331     |
| 2                   |         |                                                       | 46,435        | 19.9%    |             |         |           |
| 1                   | I48     | Atrial fibrillation and flutter                       |               | 12,050   | 24.2%       | <0.001  | 0.307     |
| 2                   |         |                                                       | 29,033        | 12.5%    |             |         |           |
| 1                   | I50     | Heart failure                                         |               | 12,043   | 24.2%       | <0.001  | 0.348     |
| 2                   |         |                                                       | 25,886        | 11.1%    |             |         |           |
| 1                   | I26-I28 | Pulmonary embolism                                    |               | 5,327    | 10.7%       | <0.001  | 0.220     |
| 2                   |         |                                                       | 11,274        | 4.8%     |             |         |           |
| 1                   | E78     | Dyslipidemia                                          |               | 26,502   | 53.2%       | <0.001  | 0.269     |
| 2                   |         |                                                       | 93,022        | 39.9%    |             |         |           |
| 1                   | E08-E13 | Diabetes mellitus                                     |               | 17,792   | 35.7%       | <0.001  | 0.280     |
| 2                   |         |                                                       | 53,805        | 23.1%    |             |         |           |
| 1                   | E65-E68 | Obesity                                               |               | 9,362    | 18.8%       | <0.001  | 0.157     |
| 2                   |         |                                                       | 30,455        | 13.1%    |             |         |           |
| 1                   | N18     | Chronic kidney disease                                |               | 11,178   | 22.4%       | <0.001  | 0.295     |
| 2                   |         |                                                       | 26,782        | 11.5%    |             |         |           |
| 1                   | I63     | Cerebral infarction                                   |               | 35,986   | 72.3%       | <0.001  | 0.829     |
| 2                   |         |                                                       | 79,321        | 34.0%    |             |         |           |
| 1                   | I73.9   | Peripheral arterial disease                           |               | 4,891    | 9.8%        | <0.001  | 0.163     |
| 2                   |         |                                                       | 12,803        | 5.5%     |             |         |           |
| <b>Procedure</b>    |         |                                                       |               |          |             |         |           |
| Cohort              |         |                                                       | Mean ± SD     | Patients | % of Cohort | P-Value | Std diff. |
| 1                   | 1013050 | Echocardiography Procedures                           |               | 21,312   | 42.8%       | <0.001  | 0.417     |
| 2                   |         |                                                       | 54,894        | 23.6%    |             |         |           |
| 1                   | 1013071 | Cardiac Catheterization Procedures                    |               | 4,050    | 8.1%        | <0.001  | 0.160     |
| 2                   |         |                                                       | 9,981         | 4.3%     |             |         |           |
| 1                   | 1013012 | Electrocardiogram, routine ECG with at least 12 leads |               | 31,735   | 63.7%       | <0.001  | 0.524     |
| 2                   |         |                                                       | 89,367        | 38.4%    |             |         |           |
| <b>Medication</b>   |         |                                                       |               |          |             |         |           |
| Cohort              |         |                                                       | Mean ± SD     | Patients | % of Cohort | P-Value | Std diff. |
| 1                   | CV350   | Antilipemic agents                                    |               | 28,950   | 58.1%       | <0.001  | 0.355     |
| 2                   |         |                                                       | 94,734        | 40.7%    |             |         |           |
| 1                   | CV100   | Beta blockers/related                                 |               | 26,886   | 54.0%       | <0.001  | 0.411     |
| 2                   |         |                                                       | 79,167        | 34.0%    |             |         |           |
| 1                   | CV300   | Antiarrhythmics                                       |               | 21,315   | 42.8%       | <0.001  | 0.343     |
| 2                   |         |                                                       | 62,222        | 26.7%    |             |         |           |
| 1                   | CV700   | Diuretics                                             |               | 20,268   | 40.7%       | <0.001  | 0.289     |
| 2                   |         |                                                       | 63,217        | 27.1%    |             |         |           |

|   |       |                                 |        |       |        |       |
|---|-------|---------------------------------|--------|-------|--------|-------|
| 1 | CV200 | Calcium channel blockers        | 19,633 | 39.4% | <0.001 | 0.304 |
| 2 |       |                                 | 59,085 | 25.4% |        |       |
| 1 | CV800 | ACE inhibitors                  | 15,588 | 31.3% | <0.001 | 0.195 |
| 2 |       |                                 | 52,802 | 22.7% |        |       |
| 1 | CV805 | Angiotensin ii inhibitor        | 8,971  | 18.0% | <0.001 | 0.118 |
| 2 |       |                                 | 31,912 | 13.7% |        |       |
| 1 | CV250 | Antianginals                    | 9,223  | 18.5% | <0.001 | 0.204 |
| 2 |       |                                 | 26,324 | 11.3% |        |       |
| 1 | BL110 | Anticoagulants                  | 29,474 | 59.2% | <0.001 | 0.544 |
| 2 |       |                                 | 76,908 | 33.0% |        |       |
| 1 | BL117 | Platelet aggregation inhibitors | 28,058 | 56.3% | <0.001 | 0.395 |
| 2 |       |                                 | 86,249 | 37.0% |        |       |

**Cohort 1 (N = 49,575) and cohort 2 (N = 49,575) characteristics after propensity score matching**

**Demographics**

| Cohort |        | Mean ± SD                 | Patients | % of Cohort | P-Value | Std diff. |
|--------|--------|---------------------------|----------|-------------|---------|-----------|
| 1      | Age    | 72.8 +/- 14.2             | 49,575   | 100%        | 0.030   | 0.014     |
| 2      |        | 72.6 +/- 14.1             | 49,575   | 100%        |         |           |
| 1      | 2106-3 | White                     | 32,105   | 64.8%       | 0.073   | 0.011     |
| 2      |        |                           | 31,835   | 64.2%       |         |           |
| 1      | F      | Female                    | 24,628   | 49.7%       | 0.129   | 0.010     |
| 2      |        |                           | 24,867   | 50.2%       |         |           |
| 1      | 2054-5 | Black or African American | 10,651   | 21.5%       | 0.244   | 0.007     |
| 2      |        |                           | 10,802   | 21.8%       |         |           |
| 1      | 2028-9 | Asian                     | 1,037    | 2.1%        | 0.532   | 0.004     |
| 2      |        |                           | 1,009    | 2.0%        |         |           |

**Diagnosis**

| Cohort |         | Mean ± SD                       | Patients | % of Cohort | P-Value | Std diff. |
|--------|---------|---------------------------------|----------|-------------|---------|-----------|
| 1      | I10-I16 | Arterial hypertension           | 35,323   | 71.3%       | <0.001  | 0.030     |
| 2      |         |                                 | 35,986   | 72.6%       |         |           |
| 1      | I20-I25 | Ischemic heart diseases         | 17,002   | 34.3%       | 0.129   | 0.010     |
| 2      |         |                                 | 17,229   | 34.8%       |         |           |
| 1      | I48     | Atrial fibrillation and flutter | 11,908   | 24.0%       | 0.882   | 0.001     |
| 2      |         |                                 | 11,888   | 24.0%       |         |           |
| 1      | I50     | Heart failure                   | 11,853   | 23.9%       | 0.698   | 0.002     |
| 2      |         |                                 | 11,801   | 23.8%       |         |           |
| 1      | I26-I28 | Pulmonary embolism              | 5,233    | 10.6%       | 0.065   | 0.012     |
| 2      |         |                                 | 5,056    | 10.2%       |         |           |
| 1      | E78     | Dyslipidemia                    | 26,397   | 53.2%       | 0.001   | 0.022     |
| 2      |         |                                 | 26,930   | 54.3%       |         |           |
| 1      | E08-E13 | Diabetes mellitus               | 17,655   | 35.6%       | 0.158   | 0.009     |
| 2      |         |                                 | 17,868   | 36.0%       |         |           |
| 1      | E65-E68 | Obesity                         | 9,308    | 18.8%       | 0.212   | 0.008     |
| 2      |         |                                 | 9,462    | 19.1%       |         |           |
| 1      | N18     | Chronic kidney disease          | 11,019   | 22.2%       | 0.630   | 0.003     |
| 2      |         |                                 | 10,956   | 22.1%       |         |           |
| 1      | I63     | Cerebral infarction             | 35,754   | 72.1%       | 0.506   | 0.004     |
| 2      |         |                                 | 35,660   | 71.9%       |         |           |
| 1      | I73.9   | Peripheral arterial disease     | 4,838    | 9.8%        | 0.246   | 0.007     |
| 2      |         |                                 | 4,947    | 10.0%       |         |           |

**Procedure**

| Cohort |         | Mean ± SD                  | Patients | % of Cohort | P-Value | Std diff. |
|--------|---------|----------------------------|----------|-------------|---------|-----------|
| 1      | 1013050 | Echocardiography           | 21,128   | 42.6%       | 0.001   | 0.021     |
| 2      |         | Procedures                 | 21,650   | 43.7%       |         |           |
| 1      | 1013071 | Cardiac Catheterization    | 4,017    | 8.1%        | 0.479   | 0.004     |
| 2      |         | Procedures                 | 4,078    | 8.2%        |         |           |
| 1      | 1013012 | Electrocardiogram, routine | 31,504   | 63.5%       | <0.001  | 0.037     |
| 2      |         | ECG with at least 12 leads | 32,391   | 65.3%       |         |           |

| <b>Medication</b> |       |                                 |               |          |             |         |           |
|-------------------|-------|---------------------------------|---------------|----------|-------------|---------|-----------|
| Cohort            |       |                                 | Mean $\pm$ SD | Patients | % of Cohort | P-Value | Std diff. |
| 1                 | CV350 | Antilipemic agents              |               | 28,806   | 58.1%       | 0.002   | 0.020     |
| 2                 |       |                                 | 29,289        | 59.1%    |             |         |           |
| 1                 | CV100 | Beta blockers/related           |               | 26,682   | 53.8%       | 0.001   | 0.021     |
| 2                 |       |                                 | 27,206        | 54.9%    |             |         |           |
| 1                 | CV300 | Antiarrhythmics                 |               | 21,138   | 42.6%       | 0.024   | 0.014     |
| 2                 |       |                                 | 21,489        | 43.3%    |             |         |           |
| 1                 | CV700 | Diuretics                       |               | 20,101   | 40.5%       | 0.017   | 0.015     |
| 2                 |       |                                 | 20,469        | 41.3%    |             |         |           |
| 1                 | CV200 | Calcium channel blockers        |               | 19,470   | 39.3%       | 0.250   | 0.007     |
| 2                 |       |                                 | 19,647        | 39.6%    |             |         |           |
| 1                 | CV800 | ACE inhibitors                  |               | 15,500   | 31.3%       | 0.012   | 0.016     |
| 2                 |       |                                 | 15,870        | 32.0%    |             |         |           |
| 1                 | CV805 | Angiotensin ii inhibitor        |               | 8,942    | 18.0%       | 0.150   | 0.009     |
| 2                 |       |                                 | 9,117         | 18.4%    |             |         |           |
| 1                 | CV250 | Antianginals                    |               | 9,153    | 18.5%       | 0.084   | 0.011     |
| 2                 |       |                                 | 9,365         | 18.9%    |             |         |           |
| 1                 | BL110 | Anticoagulants                  |               | 29,247   | 59.0%       | <0.001  | 0.028     |
| 2                 |       |                                 | 29,917        | 60.3%    |             |         |           |
| 1                 | BL117 | Platelet aggregation inhibitors |               | 27,899   | 56.3%       | 0.015   | 0.015     |
| 2                 |       |                                 | 28,278        | 57.0%    |             |         |           |

Table S3. Risk of primary and secondary outcomes in the sensitivity analyses.

|                                                                 | Reduced albumin events, n (%) | Normal albumin events, n (%) | HR (95%CI)       |
|-----------------------------------------------------------------|-------------------------------|------------------------------|------------------|
| <b>Patients aged &gt;65 years<br/>n = 121,807 (each group)</b>  |                               |                              |                  |
| Composite outcome, n (%)                                        | 47,157 (38.7)                 | 35,711 (29.3)                | 1.42 (1.40-1.44) |
| All-cause death, n (%)                                          | 17,711 (14.5)                 | 7,216 (5.9)                  | 2.62 (2.55-2.69) |
| Heart failure, n (%)                                            | 17,846 (14.7)                 | 14,566 (12.0)                | 1.29 (1.26-1.32) |
| Atrial fibrillation, n (%)                                      | 23,055 (18.9)                 | 21,670 (17.8)                | 1.11 (1.09-1.13) |
| Severe ventricular arrhythmias, n (%)                           | 2,194 (1.8)                   | 1,682 (1.4)                  | 1.36 (1.28-1.45) |
| Myocardial infarction, n (%)                                    | 6,243 (5.1)                   | 4,163 (3.4)                  | 1.56 (1.50-1.62) |
| Takotsubo, n (%)                                                | 187 (0.2)                     | 141 (0.1)                    | 1.37 (1.10-1.71) |
| <b>Females<br/>n = 83,216 (each group)</b>                      |                               |                              |                  |
| Composite outcome, n (%)                                        | 28,515 (34.3)                 | 20,770 (25.0)                | 1.47 (1.44-1.50) |
| All-cause death, n (%)                                          | 10,815 (13.0)                 | 4,336 (5.2)                  | 2.64 (2.54-2.73) |
| Heart failure, n (%)                                            | 10,938 (13.1)                 | 8,605 (10.3)                 | 1.33 (1.29-1.37) |
| Atrial fibrillation, n (%)                                      | 12,644 (15.2)                 | 11,807 (14.2)                | 1.11 (1.09-1.14) |
| Severe ventricular arrhythmias, n (%)                           | 1,107 (1.3)                   | 762 (0.9)                    | 1.51 (1.38-1.66) |
| Myocardial infarction, n (%)                                    | 3,757 (4.5)                   | 2,431 (2.9)                  | 1.60 (1.52-1.69) |
| Takotsubo, n (%)                                                | 224 (0.3)                     | 141 (0.2)                    | 1.64 (1.33-2.03) |
| <b>Patients with multimorbidity<br/>n = 56,960 (each group)</b> |                               |                              |                  |
| Composite outcome, n (%)                                        | 20,038 (35.2)                 | 13,467 (23.6)                | 1.47 (1.44-1.50) |
| All-cause death, n (%)                                          | 8,845 (15.5)                  | 3,689 (6.5)                  | 2.64 (2.54-2.73) |
| Heart failure, n (%)                                            | 7,092 (12.5)                  | 4,921 (8.6)                  | 1.33 (1.29-1.37) |
| Atrial fibrillation, n (%)                                      | 7,635 (13.4)                  | 6,781 (11.9)                 | 1.11 (1.09-1.14) |
| Severe ventricular arrhythmias, n (%)                           | 955 (1.7)                     | 663 (1.2)                    | 1.51 (1.38-1.66) |
| Myocardial infarction, n (%)                                    | 3,282 (5.8)                   | 2,043 (3.6)                  | 1.60 (1.52-1.69) |
| Takotsubo, n (%)                                                | 108 (0.2)                     | 88 (0.2)                     | 1.64 (1.33-2.03) |
| <b>Mild reduced albumin<br/>n = 135,572 (each group)</b>        |                               |                              |                  |
| Composite outcome, n (%)                                        | 47,124 (34.8)                 | 36,501 (26.9)                | 1.37 (1.35-1.39) |
| All-cause death, n (%)                                          | 15,429 (11.4)                 | 6,994 (5.2)                  | 2.31 (2.25-2.38) |
| Heart failure, n (%)                                            | 19,702 (14.5)                 | 16,049 (11.8)                | 1.28 (1.25-1.31) |
| Atrial fibrillation, n (%)                                      | 22,254 (16.4)                 | 20,716 (15.3)                | 1.11 (1.09-1.13) |
| Severe ventricular arrhythmias, n (%)                           | 2,613 (1.9)                   | 1,959 (1.4)                  | 1.38 (1.30-1.57) |
| Myocardial infarction, n (%)                                    | 6,784 (5.0)                   | 4,635 (3.4)                  | 1.51 (1.46-1.57) |
| Takotsubo, n (%)                                                | 239 (0.2)                     | 159 (0.1)                    | 1.54 (1.26-1.89) |
| <b>Severe reduced albumin<br/>n = 56,437 (each group)</b>       |                               |                              |                  |
| Composite outcome, n (%)                                        | 26,914 (45.3)                 | 17,769 (29.9)                | 1.70 (1.67-1.73) |
| All-cause death, n (%)                                          | 12,881 (21.7)                 | 3,457 (5.8)                  | 4.17 (4.01-4.32) |
| Heart failure, n (%)                                            | 10,060 (16.9)                 | 8,407 (14.1)                 | 1.29 (1.25-1.32) |
| Atrial fibrillation, n (%)                                      | 10,499 (17.7)                 | 9,972 (16.8)                 | 1.12 (1.09-1.15) |
| Severe ventricular arrhythmias, n (%)                           | 1,443 (2.4)                   | 1,006 (1.7)                  | 1.54 (1.42-1.66) |
| Myocardial infarction, n (%)                                    | 3,839 (6.5)                   | 2,321 (3.9)                  | 1.76 (1.68-1.86) |
| Takotsubo, n (%)                                                | 153 (0.3)                     | 83 (0.1)                     | 1.97 (1.51-2.57) |

HR: Hazard Ratio, CI: Confidence of Interval
